# Modified Quantitative Insulin Sensitivity Check Index Is Better Correlated to Hyperinsulinemic Glucose Clamp than Other Fasting-Based Index of Insulin Sensitivity in Different Insulin-Resistant States

RÉMI RABASA-LHORET, JEAN-PHILIPPE BASTARD, VÉRONIQUE JAN, PIERRE-HENRI DUCLUZEAU, FABRIZIO ANDREELLI, FITSUM GUEBRE, JOËLLE BRUZEAU, CORINNE LOUCHE-PELLISSIER, CHRISTINE MAÎTREPIERRE, JOCELYNE PEYRAT, JÉRÔME CHAGNÉ, HUBERT VIDAL, AND MARTINE LAVILLE

Human Nutrition Research Centre of Lyon (R.R.-L., P.-H.D., F.A., F.G., J.B., C.L.-P., C.M., J.P., J.C., M.L.), Hôpital Edouard-Herriot, Lyon 69003, France; Institut National de la Santé et de la Recherche Médicale (INSERM) U449 (R.R.-L., H.V., M.L.), Laennec Faculty of Medicine, Université Claude Bernard, Lyon 69372, France; Centre de Recherche (R.R.-L.), Centre Hospitalier de l'Université de Montréal Hôtel-Dieu, Montréal, Québec, Canada H2W 1T7; Department of Biochemistry and Hormonology (V.J.), Hôpital Tenon, Paris 75970 Cedex 20, France; and INSERM U402 (J.-P.B.), Saint-Antoine Faculty of Medicine, Université Pierre et Marie Curie, Paris 75571 Cedex 12, France

Fasting-based index estimates of insulin sensitivity were compared with euglycemic hyperinsulinemic clamp (IS clamp) measurements in 148 subjects: normal controls (n = 46), and obese (n = 12), polycystic ovary syndrome (n = 16), first-degree relatives of type 2 diabetic (n = 17), impaired glucose tolerance (n = 28), and type 2 diabetic (n = 29) patients. The fasting-based indexes tested included log homeostasis model assessment (HOMA), the quantitative insulin sensitivity check index (QUICKI), the revised QUICKI, and a new revised QUICKI using fasting plasma glycerol.

In the population studied, at 40 mU/m<sup>2</sup>·min (n = 30) revised QUICKI (r = 0.86; P < 0.0001) and QUICKI-glycerol (r = 0.87; P < 0.0001) gave higher correlations with the IS clamp than QUICKI and log HOMA (r = 0.78 and r = -0.78; P < 0.001). For

subjects tested at 75 mU/m<sup>2</sup>·min (n = 118), comparable correlations were found for all indexes (r > 0.80; P < 0.0001). When studied in subgroups, revised QUICKI and QUICKI-glycerol give significantly higher correlations with the IS clamp than other indexes for lean control subjects studied at 40mU/m<sup>2</sup>·min and impaired glucose tolerance subjects.

We confirmed, in a large patient population with a wide range of insulin sensitivities, that no single test is superior in all groups of patients. However, QUICKI and revised QUICKI are good indexes that offer correlations similar to or higher than values obtained with log HOMA. Such indexes are simple tools to estimate insulin sensitivity appropriate for epidemiological studies. (*J Clin Endocrinol Metab* 88: 4917–4923, 2003)

INSULIN RESISTANCE IS a key component of several diseases, including type 2 diabetes, obesity, hypertension, dyslipidemia, and cardiovascular disorders (1). Several methods are available to assess insulin sensitivity in humans, the “gold standard” being the euglycemic hyperinsulinemic clamp (IS clamp) because it directly measures the insulin action on glucose utilization under steady-state conditions (2). However, this technique is laborious and only applicable to a small number of subjects. Recently, Katz *et al.* (3) proposed a new, accurate index to assess insulin sensitivity in humans. This index, called “QUICKI” for the quantitative insulin sensitivity check index, is defined from fasting plasma glucose and insulin as  $1/[\log(\text{fasting insulin}) + \log(\text{fasting glucose})]$ .

It has been shown that QUICKI is an accurate index of insulin sensitivity (3, 4), better correlated to the gold standard IS clamp than other indexes, such as the minimal model index or homeostasis model assessment (HOMA) (5, 6). However, QUICKI is less correlated to the glucose clamp in nonobese, nondiabetic control subjects than in obese and

type 2 diabetic patients (3). More recently, Perseghin *et al.* (7), by incorporating fasting plasma free fatty acid (FFA) concentration into QUICKI, improved its correlation to the IS clamp and its discriminatory power in cases of mild insulin-resistant states. However, it is not known whether this revised QUICKI improves its association in insulin-resistance states, such as obesity, impaired glucose tolerance (IGT), polycystic ovary syndrome (PCOS), and type 2 diabetes mellitus. Because FFA can be reesterified or excreted in adipose tissue, whereas glycerol is always excreted, the latter could give more precise information than FFA on lipolysis.

The aims of this study were to: 1) determine whether the incorporation of fasting plasma FFA concentration into QUICKI could improve its association with the glucose clamp in several nondiabetic, insulin-resistant states; and 2) assess whether plasma glycerol could give additional information when included in the revised QUICKI formula.

## Subjects and Methods

### Subjects

The population was selected from studies conducted between 1995 and 2002. We extracted data on all subjects (ages, 18–70 yr) investigated by the standardized IS clamp (insulin infusion at 40 or 75 mU/m<sup>2</sup>·min)

Abbreviations: BMI, Body mass index; FFA, free fatty acid(s); GIR, glucose infusion rate; HOMA, homeostasis model assessment; IGT, impaired glucose tolerance; IS clamp, euglycemic hyperinsulinemic clamp; PCOS, polycystic ovary syndrome; QUICKI, quantitative insulin sensitivity check index.

who had identical quantifications of plasma glucose, insulin, FFA, and glycerol. A total of 148 of 188 subjects met these requirements. This population included: 46 controls (18 studied with 40 mU/m<sup>2</sup>·min insulin infusion, and 28 with 75 mU/m<sup>2</sup>·min), 12 obese (40 mU/m<sup>2</sup>·min), 16 females with PCOS (75 mU/m<sup>2</sup>·min), 17 first-degree relatives of type 2 diabetic patients (75 mU/m<sup>2</sup>·min), 28 IGT (75 mU/m<sup>2</sup>·min), and 29 type 2 diabetic patients (75 mU/m<sup>2</sup>·min).

Clinical and biological characteristics of these patients are described in Tables 1 and 2. All patients had a stable weight in the 3 months preceding the clamp. None presented major health problems such as liver anomalies, pulmonary disease, renal insufficiency, coronary artery disease, heart failure, or peripheral vascular disease. The controls were defined by normal weight [body mass index (BMI), 18–25 kg/m<sup>2</sup>], no first- and second-degree family history of obesity or diabetes, and normal glucose tolerance. Obese patients had normal glucose tolerance and a BMI over 30 kg/m<sup>2</sup>. PCOS patients had BMI lower than 30 kg/m<sup>2</sup> with severe oligomenorrhea, increased plasma concentration of at least 1 androgen [SHBG, bound testosterone > 5.5 ng/dl, and/or androstenedione > 230 ng/dl with ultrasonography revealing at least 10 small ovarian cysts/follicles (2–8 mm diameter)]. First-degree relatives had to have at least 1 parent with type 2 diabetes and normal glucose tolerance. IGT was defined during a 75-g oral glucose test using 1997 American Diabetes Association criteria (8). Type 2 diabetic patients needed to have a known diagnosis for more than 9 months and were studied after 4 d of oral hypoglycemic agent withdrawal if fasting blood glucose did not exceed 17.0 mmol/liter.

We chose to divide the subjects by clinical characteristics rather than with a *post hoc* definition of insulin sensitivity based on clamp outcome. Although this results in some overlap in insulin sensitivity across groups, it provides a better match with the prospective approach because such clinical characteristics are the main criteria for inclusion in all studies. All subjects gave their written consent after being informed of the nature and purpose of the study, including its possible risks. The experimental protocol, approved by the ethics committee of Hospices Civils de Lyon and Assistance Publique – Hôpitaux de Paris, was per-

formed according to the Helsinki Declaration and French legislation for research on human subjects (Huriet law).

### Study design

Except for the insulin infusion rate, the design of the clamp studies was uniform. Four days before the clamp, the subjects were instructed to avoid exercise. After an overnight (10-h) fast, all patients underwent a 3-h IS clamp (9). An antecubital vein of one arm was cannulated for infusion of 20% dextrose, potassium phosphate, and insulin (Actrapid, Novo-Nordisk, Copenhagen, Denmark). In diabetic subjects and subjects studied at 40 mU/m<sup>2</sup>·min, D2-glucose ([6,6-<sup>2</sup>H<sub>2</sub>]glucose; Euristop, St-Aubain, France) was used to measure the glucose turnover rate (10). The other arm was cannulated for sampling of arterialized blood. Insulin, D2-glucose, and 20% dextrose were delivered by calibrated syringe pumps (IVAC, Alaris, P7000; Hampshire, UK). Blood was drawn every 10 min during the last 30 min of the basal period for measurement of plasma glucose, insulin, glycerol, and FFA. After the basal period, an insulin infusion was started at the rate of 40 or 75 mU/m<sup>2</sup>·min for 180 min. Plasma glucose was measured every 10 min with a glucose analyzer (Beckman Instruments, Fullerton, CA) to adapt dextrose infusion. For normo-glycemic subjects, plasma glucose was clamped between 4.5 and 5.5 mmol/liter. For type 2 diabetic and IGT patients, a decline to 5.0 ± 0.5 mmol/liter was allowed, this value being maintained by using a variable infusion rate of 20% dextrose. During the last 40 min of the clamp, insulin and isotopic enrichment (type 2 diabetics and patients studied at 40 mU/m<sup>2</sup>·min) were again measured to obtain values in a steady-state situation.

### Laboratory analyses

Plasma glucose was quantified by the glucose oxidase method (Beckman Instruments, Fullerton, CA) and plasma insulin by RIA (Ins Irma, Kip 1251, MDS Nordion, Orsay, France). FFA were assessed by colorimetry (Wako Chemical, Neuss, Germany). Plasma glycerol was measured by the enzymatic method (11). Plasma isotopic enrichment of D2-glucose was quantified by gas chromatography-mass spectrometry (MSD 5971; Hewlett-Packard, Palo Alto, CA) as described previously (9).

### Calculations

For the fasting-based index and IS clamp, insulin sensitivity was calculated from the means of four values obtained over a 30-min period. The mean glucose infusion rate (GIR) in the last 30 min of insulin infusion was used to determine the IS clamp as follows:  $IS_{(clamp)} = GIR_{ss}/G_{ss} \times \Delta I_{ss}$ , where  $GIR_{ss}$  is the steady-state GIR (milligrams/kilogram × minutes),  $G_{ss}$  is the steady-state blood glucose concentration (milligrams per deciliter), and  $\Delta I_{ss}$  is the difference between the steady-state and basal insulin concentration (microunits per milliliter) (7).

QUICKI was calculated as described previously (3):  $QUICKI = 1/[\log(G_b) + \log(I_b)]$  where  $G_b$  is fasting plasma glucose (milligrams per deciliter), and  $I_b$  is fasting plasma insulin (microunits per milliliter). Revised QUICKI was calculated as described by Perseghin et al. (7):  $revised\ QUICKI = 1/[\log(G_b) + \log(I_b) + \log(FFA_b)]$ , where  $FFA_b$  is

**TABLE 1.** Clinical and biological characteristics of the subjects studied with insulin infusion of 40 mU/m<sup>2</sup>·min

|                              | Control<br>(40 mU/m <sup>2</sup> ·min) | Obese<br>(40 mU/m <sup>2</sup> ·min) |
|------------------------------|----------------------------------------|--------------------------------------|
| N                            | 18                                     | 12                                   |
| Age (yr)                     | 27.7 ± 1.8                             | 35.2 ± 3.5                           |
| BMI (kg/m <sup>2</sup> )     | 22.6 ± 0.36                            | 34.0 ± 1.7 <sup>a</sup>              |
| Sex ratio (M/F)              | 10/8                                   | 5/7                                  |
| Plasma glucose (mmol/liter)  | 4.8 ± 0.1                              | 5.1 ± 0.2                            |
| Plasma insulin (μU/ml)       | 7.0 ± 0.5                              | 14.1 ± 1.8 <sup>a</sup>              |
| Plasma FFA (μmol/liter)      | 498 ± 57                               | 534 ± 60                             |
| Plasma glycerol (μmol/liter) | 72.3 ± 7.9                             | 81.2 ± 11.2                          |

Comparisons *vs.* control were made using nonparametric Mann-Whitney *U* test.

<sup>a</sup> *P* < 0.001.

**TABLE 2.** Clinical and biological characteristics of the subjects studied with insulin infusion of 75 mU/m<sup>2</sup>·min

| Population (insulin infusion) | Control (75<br>mU/m <sup>2</sup> ·min) | IGT (75 mU/<br>m <sup>2</sup> ·min) | First-degree<br>relatives (75<br>mU/m <sup>2</sup> ·min) | PCOS (75<br>mU/m <sup>2</sup> ·min) | Type 2<br>diabetic<br>patients<br>(75 mU/m <sup>2</sup> ·min) | <i>P</i> (comparison<br>between groups) |
|-------------------------------|----------------------------------------|-------------------------------------|----------------------------------------------------------|-------------------------------------|---------------------------------------------------------------|-----------------------------------------|
| N                             | 28                                     | 28                                  | 17                                                       | 16                                  | 29                                                            |                                         |
| Age (yr)                      | 35.3 ± 2.7                             | 54.6 ± 1.3 <sup>a</sup>             | 28.9 ± 1.6                                               | 22.8 ± 1.1 <sup>b</sup>             | 53.2 ± 1.42 <sup>a</sup>                                      | <0.0001                                 |
| BMI (kg/m <sup>2</sup> )      | 22.6 ± 0.4                             | 31.9 ± 0.9 <sup>a</sup>             | 27.5 ± 1.6 <sup>b</sup>                                  | 23.7 ± 0.8                          | 30.6 ± 0.7 <sup>a</sup>                                       | <0.0001                                 |
| Sex ratio (M/F)               | 7/21                                   | 13/15                               | 3/14                                                     | 0/16                                | 14/15                                                         |                                         |
| Plasma glucose (mmol/liter)   | 4.7 ± 0.1                              | 6.5 ± 0.15 <sup>a</sup>             | 4.9 ± 0.1                                                | 4.6 ± 0.1                           | 11.8 ± 0.6 <sup>a</sup>                                       | <0.0001                                 |
| Plasma insulin (μU/ml)        | 5.5 ± 0.5                              | 9.71 ± 1.1 <sup>b</sup>             | 10.6 ± 1.5 <sup>a</sup>                                  | 9.5 ± 1.6                           | 10.8 ± 1.1 <sup>a</sup>                                       | <0.0001                                 |
| Plasma FFA (μmol/liter)       | 497 ± 40                               | 618 ± 27                            | 534 ± 35                                                 | 535 ± 41                            | 680 ± 49 <sup>b</sup>                                         | 0.008                                   |
| Plasma glycerol (μmol/liter)  | 64.6 ± 7.0                             | NA                                  | 73.9 ± 6.2                                               | NA                                  | 71.4 ± 7.5                                                    | 0.80                                    |

Comparisons *vs.* control were made using nonparametric Mann-Whitney *U* test. Comparisons between groups were made using nonparametric Kruskal-Wallis test. NA, Not available.

<sup>a</sup> *P* < 0.001.

<sup>b</sup> *P* < 0.05.

fasting plasma FFA (millimoles per liter). To explore whether glycerol could add important information, QUICKI-glycerol was calculated in a similar fashion as revised QUICKI:  $\text{QUICKI-glycerol} = 1 / [\log(G_b) + \log(I_b) + \log(\text{Glycerol}_b)]$  where  $\text{Glycerol}_b$  is fasting plasma glycerol (micromoles per liter).

HOMA was calculated according to the formula of Matthews *et al.* (6), *i.e.* HOMA:  $[\text{Fasting insulin (microunits per milliliter)} \times \text{Fasting glucose (millimoles per liter)}] / 22.5$ .

### Statistical analysis

All of the results are presented as means  $\pm$  SE. For clamp studies at 40 mU/m<sup>2</sup>-min insulin infusion rate, differences between obese and control subjects were determined by the Mann-Whitney *U* test. For clamp studies at 75 mU/m<sup>2</sup>-min insulin infusion rate, differences between groups were determined by the Kruskal-Wallis test followed by the Mann-Whitney *U* test for comparison between each group and the control group. Correlations were calculated by Spearman's rank correlation test. The threshold for significance was set at  $P = 0.05$ . Comparison between correlations has been made using the method reported by Zar (12).

## Results

### Subjects

We studied 148 subjects divided into different subgroups according their pathology, *i.e.* obesity, PCOS, IGT, first-degree relatives of type 2 diabetics, and type 2 diabetic patients. Characteristics of the subjects are summarized in Tables 1 and 2. In the insulin-stimulated condition (40 mU/m<sup>2</sup>-min), steady-state plasma glucose was  $5.1 \pm 0.1$  mmol/liter, whereas plasma insulin was  $89.0 \pm 3.8$   $\mu$ U/ml with no difference between control and obese subjects. At 75 mU/m<sup>2</sup>-min, steady-state plasma glucose was  $4.8 \pm 0.1$  mmol/

**TABLE 3.** Insulin sensitivity measured with euglycemic hyperinsulinemic clamp (IS clamp) and fasting based estimates of insulin sensitivity for subjects studied with insulin infusion of 40 mU/m<sup>2</sup>-min

|                 | Control<br>(40 mU/m <sup>2</sup> -min) | Obese<br>(40 mU/m <sup>2</sup> -min) |
|-----------------|----------------------------------------|--------------------------------------|
| N               | 18                                     | 12                                   |
| SI              | $14.4 \pm 1.2$                         | $6.63 \pm 0.8^a$                     |
| QUICKI          | $0.364 \pm 0.005$                      | $0.326 \pm 0.006^a$                  |
| QUICKI-FFA      | $0.418 \pm 0.008$                      | $0.364 \pm 0.01^a$                   |
| QUICKI-glycerol | $0.219 \pm 0.002$                      | $0.203 \pm 0.004^a$                  |
| Log HOMA        | $0.150 \pm 0.042$                      | $0.472 \pm 0.056^a$                  |

Comparison *vs.* control were made using nonparametric Mann-Whitney *U* test.

<sup>a</sup>  $P < 0.001$ .

**TABLE 4.** Insulin sensitivity measured with euglycemic hyperinsulinemic clamp (IS clamp) and fasting based estimates of insulin sensitivity for subjects studied with insulin infusion of 75 mU/m<sup>2</sup>-min

| Population<br>(insulin<br>infusion) | Control<br>(75 mU/m <sup>2</sup> -min) | IGT<br>(75 mU/m <sup>2</sup> -min) | First-degree<br>relatives<br>(75 mU/m <sup>2</sup> -min) | PCOS<br>(75 mU/m <sup>2</sup> -min) | Type 2 diabetic<br>patients<br>(75 mU/m <sup>2</sup> -min) | <i>P</i> (comparison<br>between groups) |
|-------------------------------------|----------------------------------------|------------------------------------|----------------------------------------------------------|-------------------------------------|------------------------------------------------------------|-----------------------------------------|
| N                                   | 28                                     | 28                                 | 17                                                       | 16                                  | 29                                                         |                                         |
| SI                                  | $8.5 \pm 0.6$                          | $4.0 \pm 0.4^a$                    | $6.4 \pm 0.8^b$                                          | $5.5 \pm 0.6^b$                     | $2.8 \pm 0.4^a$                                            | <0.0001                                 |
| QUICKI                              | $0.384 \pm 0.006$                      | $0.338 \pm 0.006^a$                | $0.346 \pm 0.006^a$                                      | $0.353 \pm 0.024$                   | $0.302 \pm 0.004^a$                                        | <0.0001                                 |
| QUICKI-FFA                          | $0.448 \pm 0.013$                      | $0.367 \pm 0.008^a$                | $0.385 \pm 0.009^a$                                      | $0.395 \pm 0.008$                   | $0.323 \pm 0.007^a$                                        | <0.0001                                 |
| QUICKI-glycerol                     | $0.234 \pm 0.006$                      | NA                                 | $0.211 \pm 0.003^b$                                      | NA                                  | $0.192 \pm 0.004^a$                                        | 0.0002                                  |
| Log HOMA                            | $0.014 \pm 0.042$                      | $0.377 \pm 0.053^a$                | $0.301 \pm 0.053^a$                                      | $0.237 \pm 0.053$                   | $0.722 \pm 0.043^a$                                        | <0.0001                                 |

Comparisons *vs.* control were made using nonparametric Mann-Whitney *U* test. Comparisons between groups were made using nonparametric Kruskal-Wallis test. N/A, Not available.

<sup>a</sup>  $P < 0.001$ .

<sup>b</sup>  $P < 0.05$ .

liter, and plasma insulin was  $171.8 \pm 4.0$   $\mu$ U/ml with no significant difference between groups (data not shown).

### Indices of insulin sensitivity

IS clamp and fasting-based estimates of insulin sensitivity are given in Tables 3 and 4. As expected, a wide range of insulin resistance was observed. Control subjects were more insulin-sensitive, followed by normoglycemic obese, first-degree relatives, PCOS patients, and IGT subjects, whereas obese type 2 diabetic patients were the most insulin-resistant.

When we analyzed control and obese subjects together ( $n = 30$ ) at 40 mU/m<sup>2</sup>-min insulin infusion, we found a higher correlation between IS clamp and either revised QUICKI ( $r = 0.86$ ;  $P < 0.0001$ ) or QUICKI-glycerol ( $r = 0.87$ ;  $P < 0.0001$ ) than both QUICKI and log HOMA ( $r = 0.78$ ,  $P < 0.0001$ ; and  $r = -0.78$ ,  $P < 0.0001$ , respectively) (Fig. 1, C and D). However, this difference did not reach a statistically significant level. For subjects studied at 75 mU/m<sup>2</sup>-min insulin infusion rate ( $n = 118$ ), we obtained a comparable correlation between revised QUICKI ( $r = 0.83$ ;  $P < 0.0001$ ) and both QUICKI and log HOMA ( $r = 0.81$ ,  $P < 0.0001$ ; and  $r = -0.81$ ,  $P < 0.0001$ , respectively) (Fig. 1, A and B).

Correlations between IS clamp and various fasting-based insulin resistance indexes in the different subgroups are shown in Table 5.

In the insulin-resistant groups, revised-QUICKI gave a comparable or higher correlation with the IS clamp than the other indexes. In IGT and PCOS patients, two groups in which revised QUICKI has not yet been investigated, revised QUICKI showed the best correlation with the IS clamp, this difference being significant for IGT patients ( $P < 0.01$ ). However, in type 2 diabetic patients, QUICKI and log HOMA appeared as good as revised QUICKI in estimating insulin resistance. QUICKI-glycerol was studied in a smaller group of patients and gave correlations similar to revised-QUICKI. Correlations tended to be lower in the control group than in different groups of insulin-resistant subjects. However, it was significantly higher for control subjects studied at the 40 mU/m<sup>2</sup>-min insulin infusion rate when either plasma FFA or plasma glycerol was included in the insulin sensitivity index calculation ( $P < 0.05$  and 0.001, respectively) (Table 5).

## Discussion

We evaluated various estimates of insulin sensitivity based on fasting plasma glucose, insulin, FFA, or glycerol

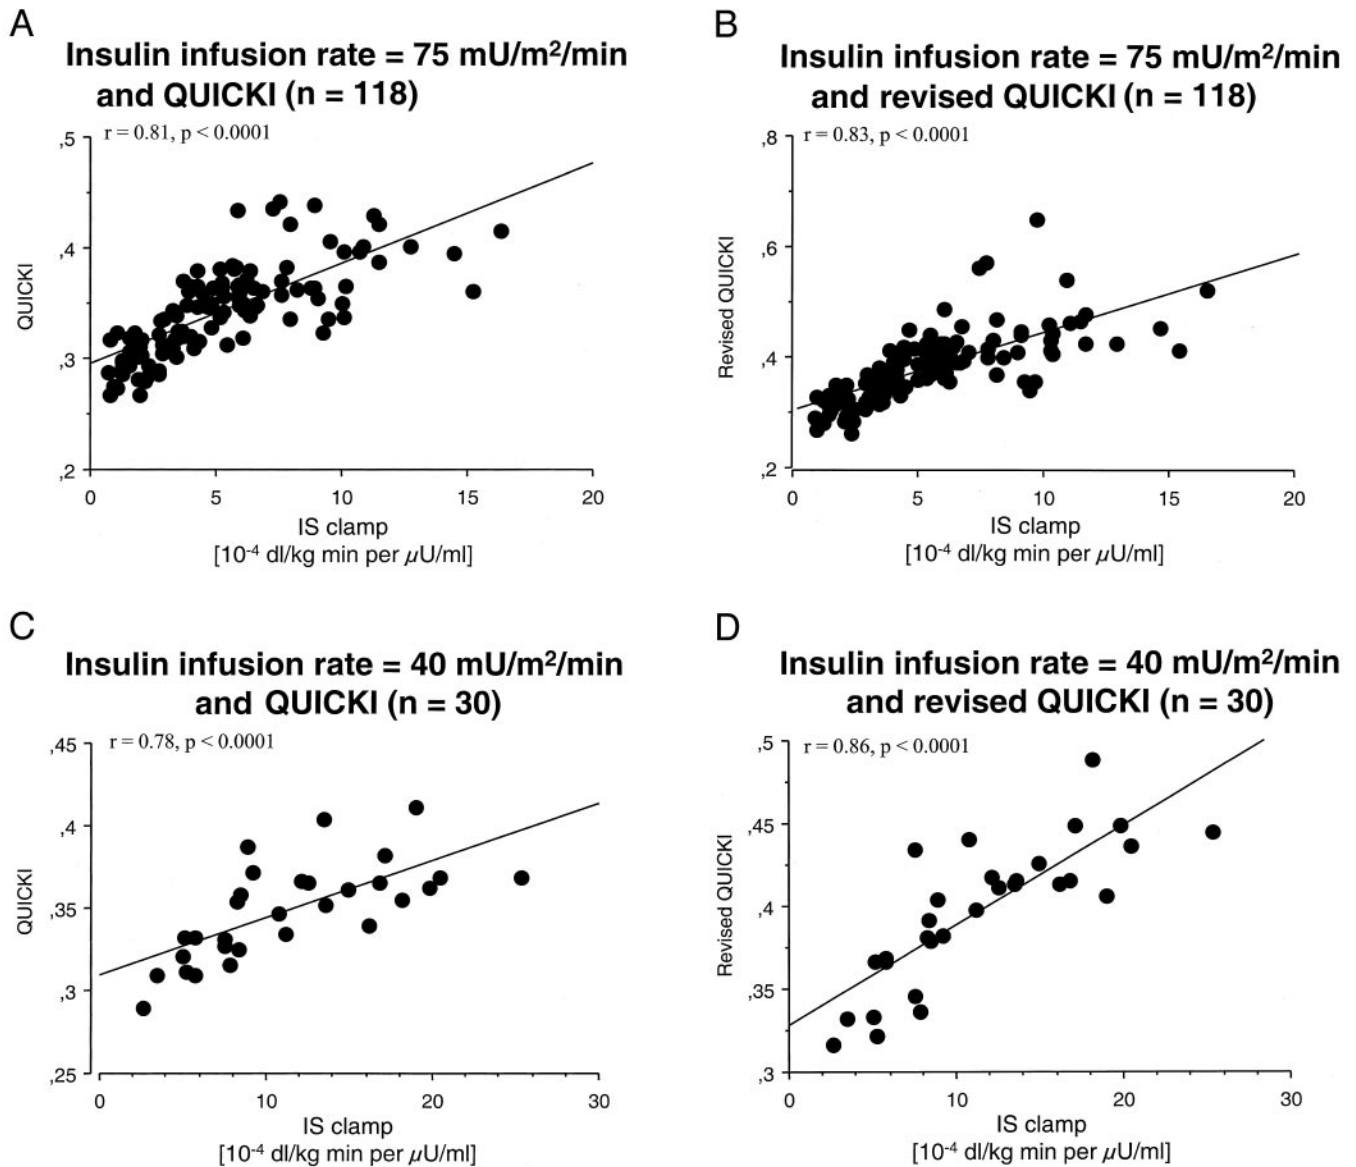

FIG. 1. Correlation between IS clamp and QUICKI (A and C) and revised QUICKI (B and D). Values from A and B (n = 128) were obtained with insulin infusion at 75 mU/m<sup>2</sup>·min, and values from C and D (n = 30) were obtained with insulin infusion at 40 mU/m<sup>2</sup>·min.

and compared them with values obtained during IS clamp in a large population with a wide range of insulin sensitivities. Our results reaffirmed the usefulness of indexes such as QUICKI or revised QUICKI, especially in the insulin-resistant state. We also confirmed that adding FFA in the QUICKI calculation can significantly improve correlations with values obtained during the IS clamp for control subjects, and we extended this observation to IGT states. However, in type 2 diabetic patients, various indexes gave comparable results. Interestingly, our findings indicated that fasting plasma glycerol generated data close to those obtained when FFA was incorporated in the formula.

Fasting-based indexes like HOMA, QUICKI, and revised QUICKI offer important advantages in estimating insulin sensitivity. They generate good and linear correlations with direct euglycemic hyperinsulinemic measurement of insulin sensitivity in different populations (3, 7, 13) as well as with

other estimates of insulin sensitivity (14–17). They are obtained from a few fasting blood samples and are thus suitable for large epidemiological studies. They do not depend on robust insulin secretory capacity, allowing the estimation of insulin sensitivity in type 2 diabetic patients in whom the use of other methods, such as the minimal model approach, can be difficult. Finally, simple indexes have been shown to differentiate insulin sensitivity between groups and prospectively track insulin sensitivity modifications in different but not all populations and pathophysiological situations (4, 7, 13, 17–29). Low insulin sensitivity estimated by QUICKI is also independently associated with carotid atherosclerosis (30). Limitations include mainly non-steady-state situations, such as hypocaloric diets, uncontrolled type 2 diabetes, and physical training (17, 31, 32).

The confirmation of a higher correlation of revised QUICKI than QUICKI with clamp measurement of insulin

**TABLE 5.** Correlation between insulin sensitivity measured with euglycemic hyperinsulinemic clamp (IS clamp) and fasting based estimates of insulin sensitivity in various subgroups

|                                     | Control 40                                     | Control 75                        | Obese 40                           | IGT 75                                         | First-degree relatives 75          | POCS 75                           | Diabetic 75                        |
|-------------------------------------|------------------------------------------------|-----------------------------------|------------------------------------|------------------------------------------------|------------------------------------|-----------------------------------|------------------------------------|
| QUICKI <i>vs.</i> IS clamp          | n = 18<br>r = 0.464<br>P = 0.055               | n = 28<br>r = 0.406<br>P = 0.035  | n = 12<br>r = 0.797<br>P = 0.0082  | n = 28<br>r = 0.655<br>P = 0.0007              | n = 17<br>r = 0.718<br>P = 0.0041  | n = 16<br>r = 0.579<br>P = 0.025  | n = 29<br>r = 0.754<br>P < 0.0001  |
| QUICKI-FFA <i>vs.</i> IS clamp      | n = 18<br>r = 0.651<br>P = 0.0073 <sup>a</sup> | n = 28<br>r = 0.374<br>P = 0.052  | n = 12<br>r = 0.881<br>P = 0.0035  | n = 28<br>r = 0.802<br>P < 0.0001 <sup>b</sup> | n = 17<br>r = 0.686<br>P = 0.006   | n = 16<br>r = 0.671<br>P = 0.0094 | n = 29<br>r = 0.767<br>P < 0.0001  |
| QUICKI-glycerol <i>vs.</i> IS clamp | n = 18<br>r = 0.818<br>P = 0.0007 <sup>a</sup> | n = 9<br>r = 0.367<br>P = 0.30    | n = 12<br>r = 0.678<br>P = 0.024   | NA                                             | n = 17<br>r = 0.718<br>P = 0.0041  | NA                                | n = 12<br>r = 0.615<br>P = 0.041   |
| Log HOMA <i>vs.</i> IS clamp        | n = 18<br>r = -0.462<br>P = 0.056              | n = 28<br>r = -0.406<br>P = 0.035 | n = 12<br>r = -0.790<br>P = 0.0088 | n = 28<br>r = -0.655<br>P = 0.0007             | n = 17<br>r = -0.716<br>P = 0.0041 | n = 16<br>r = -0.579<br>P = 0.025 | n = 29<br>r = -0.754<br>P < 0.0001 |

NA, Not available.

<sup>a</sup> The higher correlation obtained QUICKI-FFA and QUICKI-glycerol for control subjects studied with insulin infusion at 40 mU/m<sup>2</sup>-min is significantly higher than all other correlation with IS clamp ( $P < 0.05$  and  $P = 0.001$ , respectively).

<sup>b</sup> The higher correlation obtained QUICKI-FFA for IGT subjects is significantly higher than all other correlation with IS clamp ( $P < 0.01$ ).

resistance in some groups, and the similar results obtained with QUICKI-glycerol despite a smaller number of subjects, reinforce the hypothesis of Perseghin *et al.* (7) that markers of lipolysis – besides fasting plasma glucose and insulin – can add significant information to estimate insulin sensitivity.

Several reasons can explain the usefulness of incorporating FFA into the QUICKI formula: 1) Lipolysis is more sensitive to insulin than glucose utilization; thus, increased fasting FFA concentrations could reflect insulin resistance earlier than glycemia (33). 2) An experimental increment of plasma FFA concentrations in healthy patients induces insulin resistance (34). It is estimated that insulin sensitivity of lipolysis can explain about 10% of the variation in insulin sensitivity of glucose disposal in normal subjects with relationship between the two processes (33). 3) In insulin-resistant subjects, impaired regulation of lipolysis has been well-established (35).

Like FFA, plasma glycerol reflects lipolysis, which is controlled for the most part by plasma insulin. Because FFA can be reesterified or excreted, whereas glycerol is always excreted, plasma glycerol could give interesting information (36). The availability of glycerol in a fraction of the population limits the conclusion that can be drawn; however, the results obtained with QUICKI-glycerol appear to be close to those obtained with revised-QUICKI (Table 5). Thus, the eventual interest in this index awaits studies in larger populations.

The benefit from adding a marker of lipolysis to the QUICKI formula is not constant because we noted no improvement of correlations for type 2 diabetics, obese subjects, and first-degree relatives of diabetic patients. In type 2 diabetic patients, it is possible that the differences in plasma FFA concentrations become negligible, compared with the high variation of glycemia and insulinemia, and are thus, insufficient to improve QUICKI accuracy. The inverse situation could prevail in control subjects where the small variation observed in a lipolysis marker added to the formula could improve the sensitivity of QUICKI. In obese subjects and first-degree relatives, it can be speculated that FFA interindividual variation is lower than that of insulin, which

could explain the lack of improvement by adding FFA into QUICKI.

Formulae including the lipolysis marker should, however, be used with caution in situations where FFA levels are affected by interventions. We have recently reported that after a very low-calorie diet, in which FFA level reflected mainly lipolysis induced by diet rather than resistance to the antilipolytic effect of insulin, revised QUICKI gave false interpretations of insulin-sensitivity modifications (31).

For lean control subjects, there is a less robust correlation between QUICKI and the IS clamp than for insulin-resistant groups, whatever the insulin infusion rate studied. Other indexes confirm a lower correlation between fasting-based index estimation and clamp measurement of insulin resistance in control subjects (Table 5). It has already been suggested that QUICKI and HOMA less accurately reflect insulin sensitivity in insulin-sensitive populations than in more insulin-resistant groups (3, 14, 18). Our data also confirm that higher correlations are obtained between QUICKI and euglycemic clamp in normal subjects when they are studied at a low infusion rate (40 mU/m<sup>2</sup>-min) but not at higher rates (18), and we extend this notion to revised QUICKI. It could be hypothesized that measurement of insulin resistance with a high level of insulin (75 mU/m<sup>2</sup>-min) does not explore the same component of insulin resistance as clamps using lower doses (40 mU/m<sup>2</sup>-min). Fasting-based indexes could be closer to the IS clamp measured with a lower insulin infusion rate (37). Although insulin infusion at 40 mU/m<sup>2</sup>-min is high to explore sensitivity of lipolysis to insulin, it could still incorporate some information that is not present with higher doses of insulin. This is supported by the fact that the addition of lipolysis markers, which is more sensitive to the effect of insulin, in the formula can improve the sensitivity of QUICKI in control subjects.

On the other hand, lower correlations in normal subjects could be secondary to the greater variability of insulin assay (including ultrasensitive assays) in the lower normal range associated with known physiological pulsatility secretion and the short-term serum half-life of insulin (18, 38). In control subjects, fasting glucose and insulin are both within a narrow range, which makes it difficult for indexes solely

based on these variables to span with accuracy the wide spectrum of insulin sensitivity present in normal individuals. The absence of or lower correlation between the IS clamp and QUICKI in lean control groups could also be due to population characteristics: BMI inclusion criteria were strictly limited to the normal range, whereas previous works also included overweight (25–30 kg/m<sup>2</sup>) and underweight (<18 kg/m<sup>2</sup>) subjects. Moreover, our control group did not include any first- or second-degree diabetic relatives; and, finally, some control subjects included in previous studies were already quite insulin-resistant (mean glucose infusion rate, 4.85 ± 0.25 mg/kg·min) compared with the usual values in normal populations (7, 14, 18). The presence of a good correlation in global populations, with significantly lower correlation in some subgroups (*i.e.* lean controls), indicates that fasting-based indexes of insulin sensitivity, despite their evident usefulness, should be used with caution in normal populations because an insulin-resistant subset could systematically affect correlation with other measures in a larger population (18).

In conclusion, we confirmed in a large group of patients across a broad range of insulin sensitivities that no single test is highly superior in all groups of patients, but QUICKI and revised QUICKI are good indexes that offer correlations similar to or higher than values obtained with log HOMA. We confirmed the validity and usefulness of these indexes in PCOS and IGT populations, two groups in which insulin resistance is a central mechanism of pathogenesis disease. When groups are studied separately, revised QUICKI or QUICKI-glycerol appears better related to the IS clamp than other indexes if insulin sensitivity is measured with insulin infusion at 40 mU/m<sup>2</sup>·min for control subjects and IGT subjects with insulin infusion at 75 mU/m<sup>2</sup>·min. The results with revised QUICKI and a formula including glycerol are interesting because they add information about the insulin action on lipolysis, which is related to the insulin action on glucose metabolism. Promising data obtained with index incorporating information on lipolysis should be confirmed in a larger population, especially in normal, sensitive subjects in which fasting-based indexes give lower correlations. Fasting-based indexes are simple tools appropriate for epidemiological studies.

### Acknowledgments

We thank Ms. Victoria Baranga for preparing this manuscript and Mr. Ovid Da Silva for his editorial assistance.

Received February 25, 2003. Accepted June 14, 2003.

Address all correspondence and requests for reprints to: Rémi Rabasa-Lhoret, M.D., Ph.D., Division of Endocrinology Research Centre, Centre Hospitalier de l'Université de Montréal Hôtel-Dieu 3850, Saint-Urbain St. Montréal, Québec, Canada H2W 1T7. E-mail: remi.rabasa-lhoret@umontreal.ca.

This work was supported by a postdoctoral fellowship from the French Diabetes Association (ALFEDIAM-Servier grant; to R.R.-L.) and a postdoctoral award from the Information, Educational and Research Centre in Nutrition (CERIN, Paris, France; to R.R.-L.).

### References

1. Reaven GM 1988 Banting lecture 1988. Role of insulin resistance in human disease. *Diabetes* 37:1595–1607
2. DeFronzo RA, Tobin JD, Andres R 1979 Glucose clamp technique: a method for quantifying insulin secretion and resistance. *Am J Physiol* 237:E214–E223
3. Katz A, Nambi SS, Mather K, Baron AD, Follmann DA, Sullivan G, Quon MJ 2000 Quantitative insulin sensitivity check index: a simple, accurate method for assessing insulin sensitivity in humans. *J Clin Endocrinol Metab* 85:2402–2410
4. Bastard JP, Robert JJ, Jardel C, Bruckert E, Grimaldi A, Hainque B 2001 Is quantitative insulin sensitivity check index, a fair insulin sensitivity index in humans? *Diabetes Metab* 27:69–70
5. Bergman RN, Prager R, Volund A, Olefsky JM 1987 Equivalence of the insulin sensitivity index in man derived by the minimal model method and the euglycemic glucose clamp. *J Clin Invest* 79:790–800
6. Matthews DR, Hosker JP, Rudenski AS, Naylor BA, Treacher DF, Turner RC 1985 Homeostasis model assessment: insulin resistance and  $\beta$ -cell function from fasting plasma glucose and insulin concentrations in man. *Diabetologia* 28:412–419
7. Perseghin G, Caumo A, Caloni M, Testolin G, Luzi L 2001 Incorporation of the fasting plasma FFA concentration into QUICKI improves its association with insulin sensitivity in nonobese individuals. *J Clin Endocrinol Metab* 86:4776–4781
8. 1997 Report of the Expert Committee on the Diagnosis and Classification of Diabetes Mellitus. *Diabetes Care* 20:1183–1197
9. Ducluzeau PH, Perretti N, Laville M, Andreelli F, Vega N, Riou JP, Vidal H 2001 Regulation by insulin of gene expression in human skeletal muscle and adipose tissue. Evidence for specific defects in type 2 diabetes. *Diabetes* 50:1134–1142
10. Laville M, Auboeuf D, Khalfallah Y, Vega N, Riou JP, Vidal H 1996 Acute regulation by insulin of phosphatidylinositol-3-kinase, Rad, Glut 4, and lipoprotein lipase mRNA levels in human muscle. *J Clin Invest* 98:43–49
11. Bergmeyer H 1974 Glycerol by enzymatic methods. In: Eggstein M, Kulman E, eds. *Methods of enzymatic analysis*. New York: Academic Press; 1825–1835
12. Zar JH 1999 Comparing two correlation coefficients. In: Clifton D, ed. *Biostatistical analysis*. Englewood Cliffs, NJ: Prentice-Hall; 386–387
13. Uwaifo GI, Fallon EM, Chin J, Elberg J, Parikh SJ, Yanovski JA 2002 Indices of insulin action, disposal, and secretion derived from fasting samples and clamps in normal glucose-tolerant black and white children. *Diabetes Care* 25:2081–2087
14. Abbasi F, Reaven GM 2002 Evaluation of the quantitative insulin sensitivity check index as an estimate of insulin sensitivity in humans. *Metabolism* 51:235–237
15. Silfen ME, Manibo AM, McMahon DJ, Levine LS, Murphy AR, Oberfield SE 2001 Comparison of simple measures of insulin sensitivity in young girls with premature adrenarche: the fasting glucose to insulin ratio may be a simple and useful measure. *J Clin Endocrinol Metab* 86:2863–2868
16. Gonzalez-Albarran O, Garcia-Robles R 2001 Correlation between insulin suppression test and quantitative insulin sensitivity check index in hypertensive and normotensive obese patients. *Diabetes Care* 24:1998–2000
17. Duncan GE, Hutson AD, Stacpoole PW 2001 QUICKI does not accurately reflect changes in insulin sensitivity with exercise training. *J Clin Endocrinol Metab* 86:4115–4119
18. Mather KJ, Hunt AE, Steinberg HO, Paradisi G, Hook G, Katz A, Quon MJ, Baron AD 2001 Repeatability characteristics of simple indices of insulin resistance: implications for research applications. *J Clin Endocrinol Metab* 86:5457–5464
19. Freemark M, Bursey D 2001 The effects of metformin on body mass index and glucose tolerance in obese adolescents with fasting hyperinsulinemia and a family history of type 2 diabetes. *Pediatrics* 107:E55
20. Quon MJ 2002 QUICKI is a useful and accurate index of insulin sensitivity. *J Clin Endocrinol Metab* 87:949–951
21. Rabasa-Lhoret R, Laville M 2001 How to measure insulin sensitivity in clinical practice? *Diabetes Metab* 27:201–208
22. Kirwan JP, Huston-Presley L, Kalhan SC, Catalano PM 2001 Clinically useful estimates of insulin sensitivity during pregnancy: validation studies in women with normal glucose tolerance and gestational diabetes mellitus. *Diabetes Care* 24:1602–1607
23. Dixon JB, Bhathal PS, O'Brien PE 2001 Nonalcoholic fatty liver disease: predictors of nonalcoholic steatohepatitis and liver fibrosis in the severely obese. *Gastroenterology* 121:91–100
24. Houmard JA, Shinebarger MH, Dolan PL, Leggett-Frazier N, Bruner RK, McCammon MR, Israel RG, Dohm GL 1993 Exercise training increases GLUT-4 protein concentration in previously sedentary middle-aged men. *Am J Physiol* 264:E896–E901
25. Cox JH, Cortright RN, Dohm GL, Houmard JA 1999 Effect of aging on response to exercise training in humans: skeletal muscle GLUT-4 and insulin sensitivity. *J Appl Physiol* 86:2019–2025
26. Lampman RM, Santinga JT, Savage PJ, Bassett DR, Hydrick CR, Flora Jr JD, Block WD 1985 Effect of exercise training on glucose tolerance, in vivo insulin sensitivity, lipid and lipoprotein concentrations in middle-aged men with mild hypertriglyceridemia. *Metabolism* 34:205–211
27. Katsuki A, Sumida Y, Gabazza EC, Murashima S, Furuta M, Araki-Sasaki R, Hori Y, Yano Y, Adachi Y 2001 Homeostasis model assessment is a reliable

- indicator of insulin resistance during follow-up of patients with type 2 diabetes. *Diabetes Care* 24:362–365
28. **Katsuki A, Sumida Y, Gabazza EC, Murashima S, Urakawa H, Morioka K, Kitagawa N, Tanaka T, Araki-Sasaki R, Hori Y, Nakatani K, Yano Y, Adachi Y** 2002 QUICKI is useful for following improvements in insulin sensitivity after therapy in patients with type 2 diabetes mellitus. *J Clin Endocrinol Metab* 87:2906–2908
  29. **Hrebicek J, Janout V, Malincikova J, Horakova D, Cizek L** 2002 Detection of insulin resistance by simple quantitative insulin sensitivity check index QUICKI for epidemiological assessment and prevention. *J Clin Endocrinol Metab* 87:144–147
  30. **Rajala U, Laakso M, Paivansalo M, Pelkonen O, Suramo I, Keinanen-Kiukkaanniemi S** 2002 Low insulin sensitivity measured by both quantitative insulin sensitivity check index and homeostasis model assessment method as a risk factor of increased intima-media thickness of the carotid artery. *J Clin Endocrinol Metab* 87:5092–5097
  31. **Bastard JP, Jan V, Maachi M, Rabasa-Lhoret R, Jardel C, Bruckert E, Laville M, Hainque B** 2002 Incorporation of nonesterified fatty acids into QUICKI is not relevant in obese subjects during diet inducing weight loss. *Diabetes Metab* 28:333–334
  32. **Katsuki A, Sumida Y, Urakawa H, Gabazza EC, Murashima S, Morioka K, Kitagawa N, Tanaka T, Araki-Sasaki R, Hori Y, Nakatani K, Yano Y, Adachi Y** 2002 Neither homeostasis model assessment nor quantitative insulin sensitivity check index can predict insulin resistance in elderly patients with poorly controlled type 2 diabetes mellitus. *J Clin Endocrinol Metab* 87:5332–5335
  33. **Stumvoll M, Wahl HG, Machicao F, Haring H** 2002 Insulin sensitivity of glucose disposal and lipolysis: no influence of common genetic variants in IRS-1 and CAPN10. *Diabetologia* 45:651–656
  34. **Roden M, Price TB, Perseghin G, Petersen KF, Rothman DL, Cline GW, Shulman GI** 1996 Mechanism of free fatty acid-induced insulin resistance in humans. *J Clin Invest* 97:2859–2865
  35. **Groop LC, Bonadonna RC, DelPrato S, Ratheiser K, Zyck K, Ferrannini E, DeFronzo RA** 1989 Glucose and free fatty acid metabolism in non-insulin-dependent diabetes mellitus. Evidence for multiple sites of insulin resistance. *J Clin Invest* 84:205–213
  36. **Laville M, Riou J-P** 2001 L'énergie. In: Basdevant A, Laville M, Lerebours E, eds. *Traité de nutrition clinique de l'adulte*. Paris: Médecine-Sciences Flammarion; 19–24
  37. **Wallace TM, Matthews DR** 2002 The assessment of insulin resistance in man. *Diabet Med* 19:527–534
  38. **Lang D, Matthews D, Burnett M, Ward G, Turner R** 1983 Pulsatile synchronous basal insulin and glucagon secretion in man. *Diabetes* 31:22–26
